# Supplementary material for: Call for Decision Support for High-Alert Medication Administration Among Pediatric Nurses: Findings From a Large, Multicenter, Cross-Sectional Survey in China
Source: PubMed Central journal article supplement (PMC9343802; doi:10.3389/fphar.2022.860438), 2022-07-19
Supplement: DataSheet1.pdf [file DataSheet1.pdf]

## 调查问卷

亲爱的护理同仁，

您好！本问卷的调查目的是为了了解儿科护士对高警示药品的认知水平、脑力负荷、决策依据、决策信心、决策支持需求及安全文化环境情况，为后阶段构建临床决策支持系统提供实证依据。问卷不记名，大约需要花费您 10-15 分钟。

非常感谢您的支持！

（注：高警示药品，又称高危药品，本调查涉及到的高警示药品以贵院高警示药品目录为准）

### 第一部分 调查问卷

#### 一、高警示药品知识问卷

下方有 20 个有关高警示药品的表述，其中前十个有关高警示药品给药方法；后十个有关高警示药品管理方法。请判断是否正确，并用√/×表示。

| 序号 | 表述                                             | √/× |
|----|------------------------------------------------|-----|
| 1  | 患者发生轻度过敏反应时，用 1: 1000 肾上腺素静脉快推                 |     |
| 2  | 急救时，可用 10%CaCl <sub>2</sub> 10ml 在 1-2 分钟内静脉快推 |     |
| 3  | 10%葡萄糖酸钙与 10% CaCl <sub>2</sub> 一样，可以互换        |     |
| 4  | “cc”或“ml”是胰岛素注射时使用的剂量表达                        |     |
| 5  | 计算化疗剂量时，成人以体重为基础，儿童以体表面积为基础                    |     |
| 6  | 如果发生了室颤之类的急救，可以使用 10ml 的 15%KCl 静脉快推           |     |
| 7  | 15%KCl 最好添加到林格液中快速静滴                           |     |
| 8  | 胰岛素注射器可以用 1ml 注射器替代                            |     |
| 9  | 对于低钠患者，可以静脉快速输注 500ml 的 3%NaCl                 |     |
| 10 | Port-A 输液泵可以用于抽血或注射药物                          |     |
| 11 | 表述剂量时，使用“安剖”或“瓶”，而非“mg”或“gm”                   |     |
| 12 | 对于外观相似药品，应使用醒目标签                               |     |
| 13 | 表述剂量时，应使用“U”而非“单位”                             |     |
| 14 | 肝素和胰岛素应一起储存在冰箱里，以便取用                           |     |
| 15 | 每个药品最好有各种浓度规格，方便护士选择                           |     |
| 16 | 如果患者可耐受，钾剂最好口服，而非静脉用药                          |     |
| 17 | 15% KCl 使用频繁，因此护士应该容易且方便获得 15% KCl             |     |
| 18 | 对于儿童剂量，可以使用“勺”表述剂量                             |     |
| 19 | 芬太尼透皮贴剂属于常规麻醉剂                                 |     |
| 20 | 如果病区里需要存放肌松剂以备气管插管，肌松剂应该与其他药物放在一起，护士可以方便获得     |     |

#### 二、高警示药品给药相关的临床决策信心、依据、支持需求

1. 您对自己平时高警示药品给药相关决策（包括并不限于核对、配置、给药方法、药效评估、不良反应的预防和监控、宣教等）的正确性，有多大的信心？

极小把握  很少把握  较小把握  较大把握  很大把握  极大把握

2. 以下是高警示药品给药涉及到的决策，请按照难度进行排序

核对  配置  给药方法  药效评估  不良反应的预防和监控  宣教

医嘱正确性  其他\_\_\_\_\_

3. 您平时需要进行高警示药品给药相关决策时，最主要的依据是什么？可以多选
- 经验                       教科书                       药物手册                       院内规章制度
- 医生                       药师                       同事、领导                       药物说明书
- 专题讲座                       学术会议                       系统评价                       临床指南
- 原始研究                       其他\_\_\_\_\_
4. 您平时高警示药品给药时是否需要决策支持？
- 非常需要     需要     不确定     不需要     非常不需要
5. 如果能够实现，您倾向于什么形式的高警示药品给药相关决策支持？
- 纸质书     电子书     药师实时交流     决策支持系统
- 其他\_\_\_\_\_

## 第二部分 基础资料

1. 所在医院：
- 上海交通大学医学院附属上海儿童医学中心     复旦大学附属儿科医院
- 首都医科大学附属北京儿童医院     浙江大学医学院附属儿童医院
- 重庆医科大学附属儿童医院     湖南省儿童医院
- 南京医科大学附属儿童医院     广州市妇女儿童医疗中心
- 河南省儿童医院     大连市儿童医院
- 河北省儿童医院     西安市儿童医院
- 苏州儿童医院     广州孙逸仙纪念医院
2. 所在科室：
- PICU     儿童血液肿瘤科     儿童心血管科     CICU     新生儿科
- NICU     小儿呼吸内科     小儿普外科
3. 性别： 女     男
4. 出生年月：\_\_\_\_\_年\_\_\_\_\_月
5. 婚姻状况： 未婚     已婚     离异或丧偶     其他
6. 子女状况： 无     1个     ≥2个
7. 第一学历： 中专     大专     本科     硕士及以上
8. 现阶段学历（包括在读）： 中专     大专     本科     硕士及以上
9. 职称： 护士     护师     主管护师     副主任护师及以上
10. 现任角色： 责任护士     协助护士
- 护理带教     护理组长     专科护士     其他\_\_\_\_\_
11. 儿科护理工作年限：\_\_\_\_\_年
12. 贵院是否有高警示药品给药相关的操作标准或实践常规？ 是     否
13. 近1年，您是否接受过高警示药品给药相关的培训？ 是     否
14. 近1年，您平时进行高警示药品给药的频率如何？
- 每天≥1次     每周≥1次     每月≥1次     每年≥1次     没有过
15. 近1年，您自己或您的同事是否曾经发生过给药错误事件（包括报告的、及未报告的）？
- 否     是
- 给药错误事件中是否涉及到高警示药品？ 否     是

感谢您的支持！
